# Supplementary material for: The conjunctival microbiome in health and trachomatous disease: a case control study
Source: PubMed Central journal article supplement (PMC4256740; doi:10.1186/s13073-014-0099-x), 2014-11-15

# Additional File 3

Stratification by ethnicity

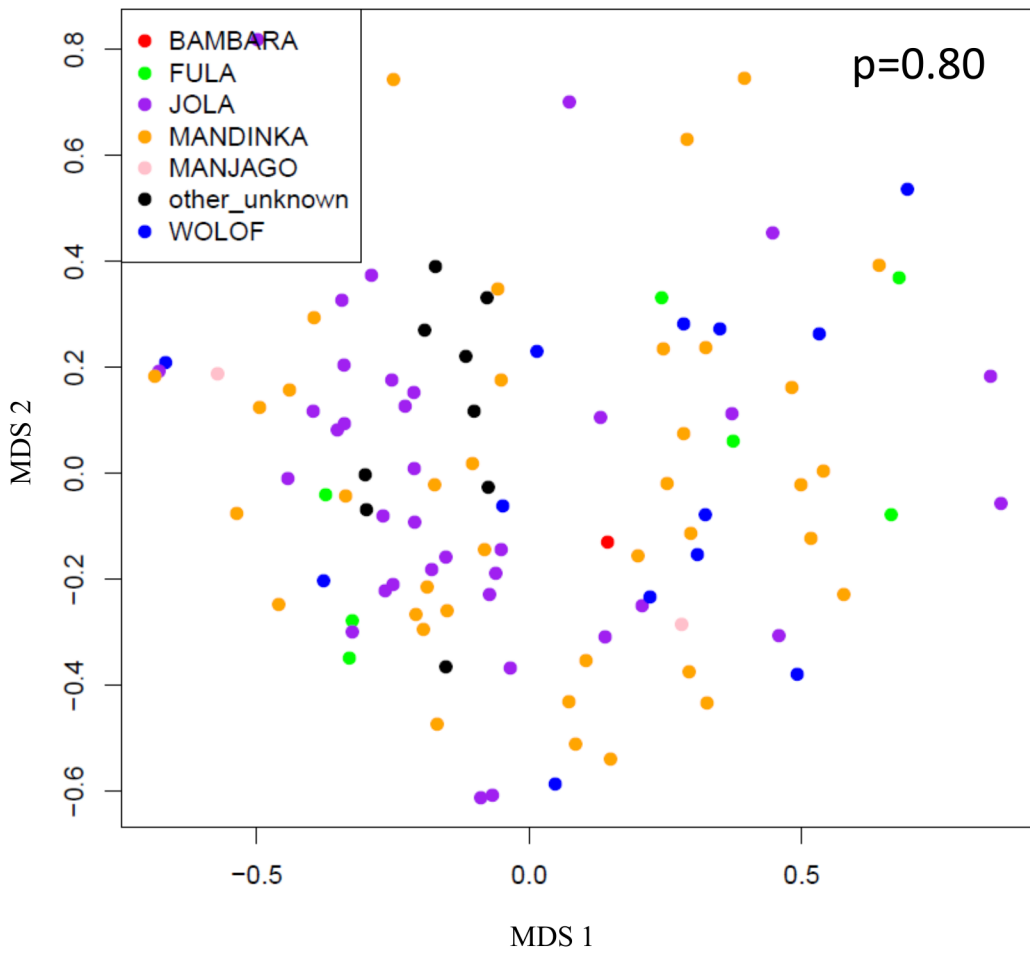

Supplement: 13073_2014_99_MOESM3_ESM.pdf [file 13073_2014_99_MOESM3_ESM.pdf]
