# Supplementary material for: The conjunctival microbiome in health and trachomatous disease: a case control study
Source: PubMed Central journal article supplement (PMC4256740; doi:10.1186/s13073-014-0099-x), 2014-11-15

# Additional File 4

Comparison of richness and diversity between participants  $\leq 10$  and  $>10$  years of age

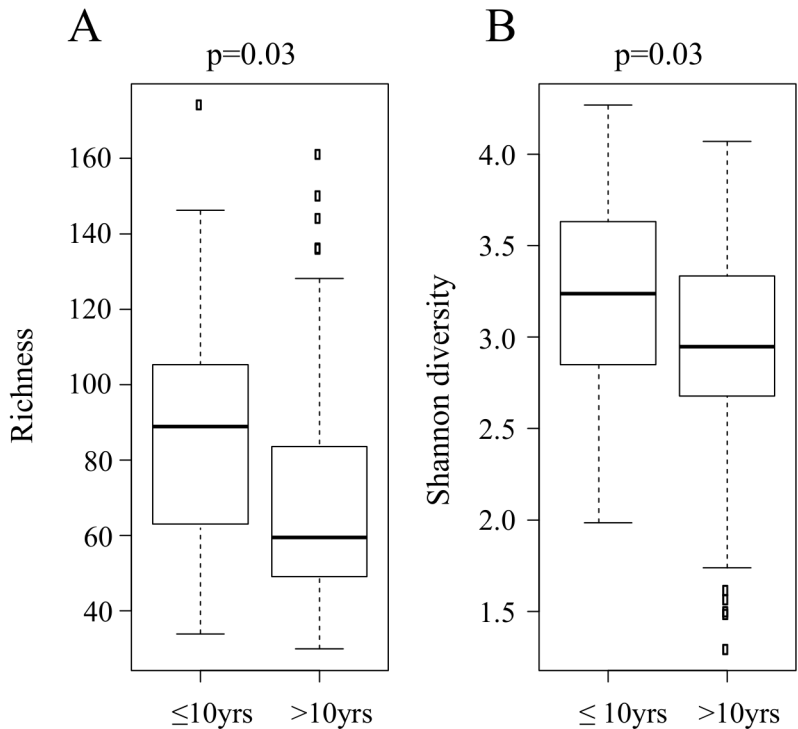

Supplement: 13073_2014_99_MOESM4_ESM.pdf [file 13073_2014_99_MOESM4_ESM.pdf]
